# Supplementary figures and images for: A Comprehensive Look at the -13910 C>T LCT Gene Polymorphism as a Molecular Marker for Vitamin D and Calcium Levels in Young Adults in Central and Eastern Europe: A Preliminary Study
Source: MDPI journal article supplement (doi:10.3390/ijms241210191), 2023-06-15

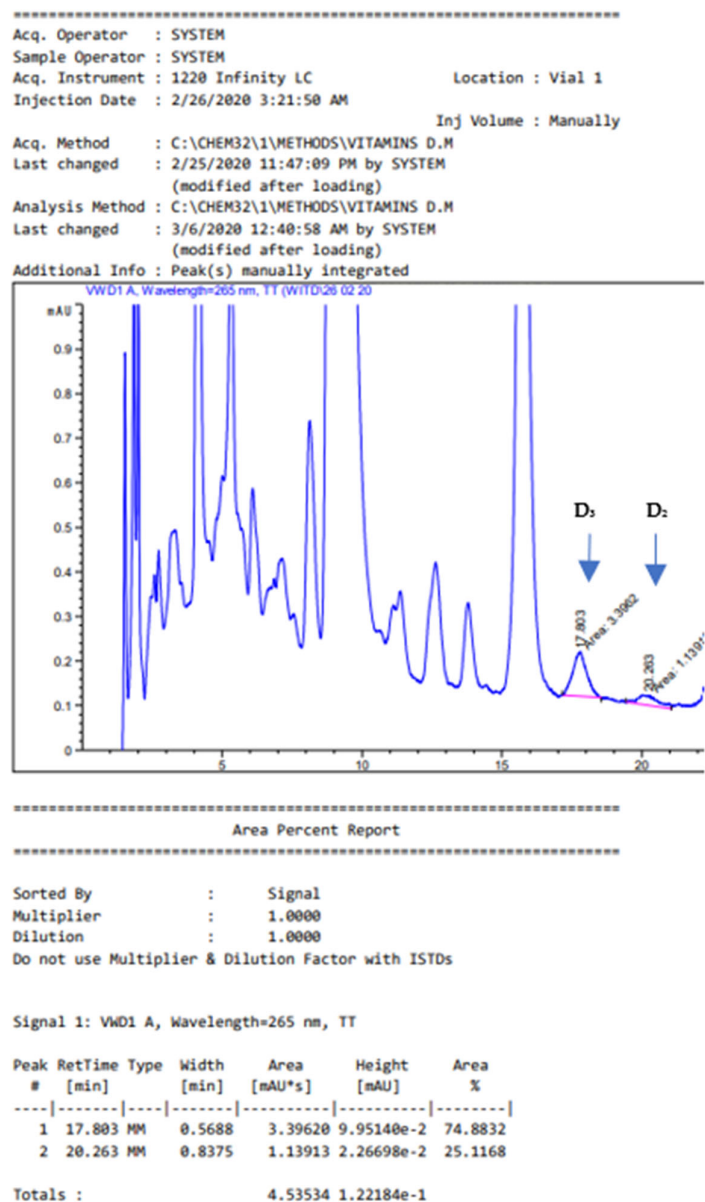

**Figure S1.** An example chromatogram of the separation of vitamin D metabolites.

Supplement: s1 [file s1]
